# Supplementary material for: Character-based DNA barcoding for authentication and conservation of IUCN Red listed threatened species of genus Decalepis (Apocynaceae)
Source: PubMed Central journal article supplement (PMC5668324; doi:10.1038/s41598-017-14887-8), 2017-11-02
Supplement: 41598_2017_14887_MOESM1_ESM.pdf [file 41598_2017_14887_MOESM1_ESM.pdf]

# Character-based DNA barcoding for authentication and conservation of IUCN Red listed threatened species of genus *Decalepis* (Apocynaceae)

Priyanka Mishra<sup>1</sup>, Amit Kumar<sup>1</sup>, Sivaraman Gokul<sup>1</sup>, Ashutosh K. Shukla<sup>2</sup>,  
Kaliamoorthy Ravikumar<sup>3</sup>, Adrian Slater<sup>4</sup> & Velusamy Sundaresan<sup>1,\*</sup>

<sup>1</sup> *Plant Biology and Systematics, CSIR - Central Institute of Medicinal and Aromatic Plants, Research Center, Allalsandra, GKV Post, Bengaluru - 560065, Karnataka, India*

<sup>2</sup> *Biotechnology Division, CSIR - Central Institute of Medicinal and Aromatic Plants, P.O. CIMAP, Lucknow - 226015, Uttar Pradesh, India*

<sup>3</sup> *School of Conservation, TransDisciplinary University, 74/2, Jarakabande Kaval, Post Attur, Via Yelahanka, Bangalore - 560064, Karnataka, India*

<sup>4</sup> *Biomolecular Technology Group, Faculty of Health and Life Sciences, De Montfort University, Leicester, LE1 9BH, UK*

\* Correspondence: Dr. V. Sundaresan  
Senior Scientist  
Plant Biology and Systematics  
CSIR - Central Institute of Medicinal and Aromatic Plants, Research Center, Bengaluru - 560065, Karnataka, India  
Tel: +91 – 80 – 22746956; Fax: +91 – 80 – 28564707  
vsundaresan@cimap.res.in

CIMAP Communication Number: CIMAP/PUB/2016/85

## Supplementary information

**Figure S1** Morphological view of: (a - b) *Decalepis arayalpathra* fresh roots in wild (c) Raw drug samples of *D. arayalpathra* roots in markets (d) *D. hamiltonii* fresh roots in wild (e) *D. hamiltonii* dried roots in wild (f) Raw drug samples of *D. hamiltonii* roots in markets (g) *D. salicifolia* fresh roots in wild (h) *Hemidesmus indicus* fresh roots in wild (i) Raw drug samples of *H. indicus* roots in markets (j) Raw drug samples of *H. indicus* stems in markets.

**Figure S2** Relative distribution of intra-specific and inter-specific distances for all the single and combination of favourable barcodes in *Decalepis*; x-axes relate to K2P distances arranged in intervals, and the y-axes correspond to the percentage of occurrences.

**Figure S3** Maximum parsimony trees constructed using candidate barcode markers showing species resolution rates in terms of single locus. Bootstrap support values below 70% are not shown.

**Table S1** Primers used for amplification and sequencing for DNA barcoding of *Decalepis* species.

**Table S2** Mean and maximum intra-specific and nearest neighbor (NN) distance for all the species using candidate barcodes.

**Table S3** Genetic distance (%) measured using Kimura 2-parameter model for the candidate barcode loci and their combinations.

**Table S4** Identification success rates based on analysis of the 'Best Match', 'Best Close Match' and 'All Species Barcodes' function of TaxonDNA software for each DNA barcoding marker and its combinations.

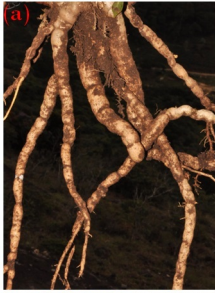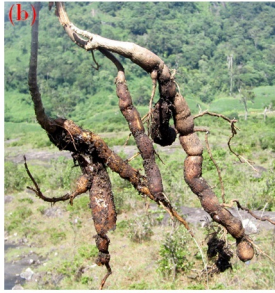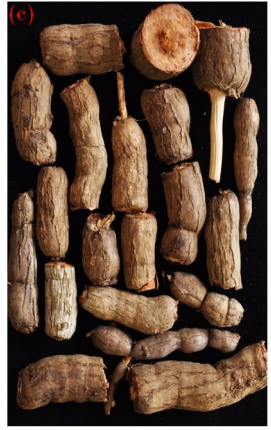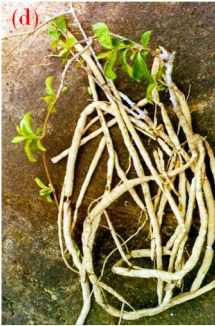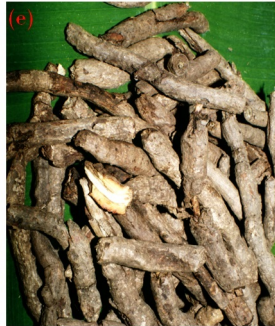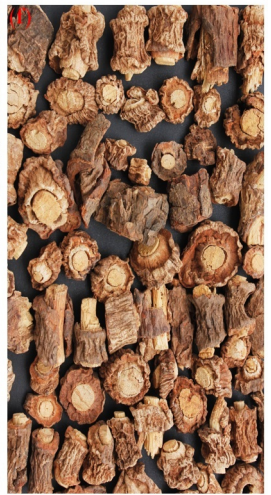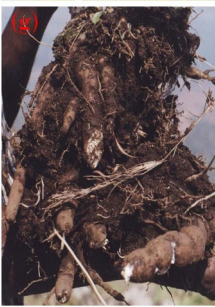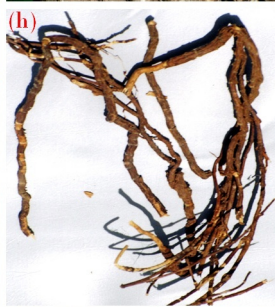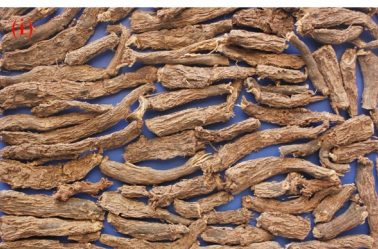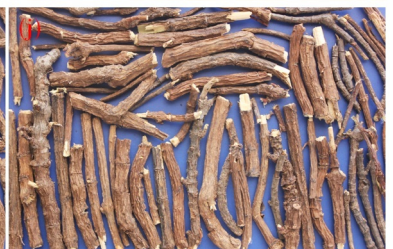

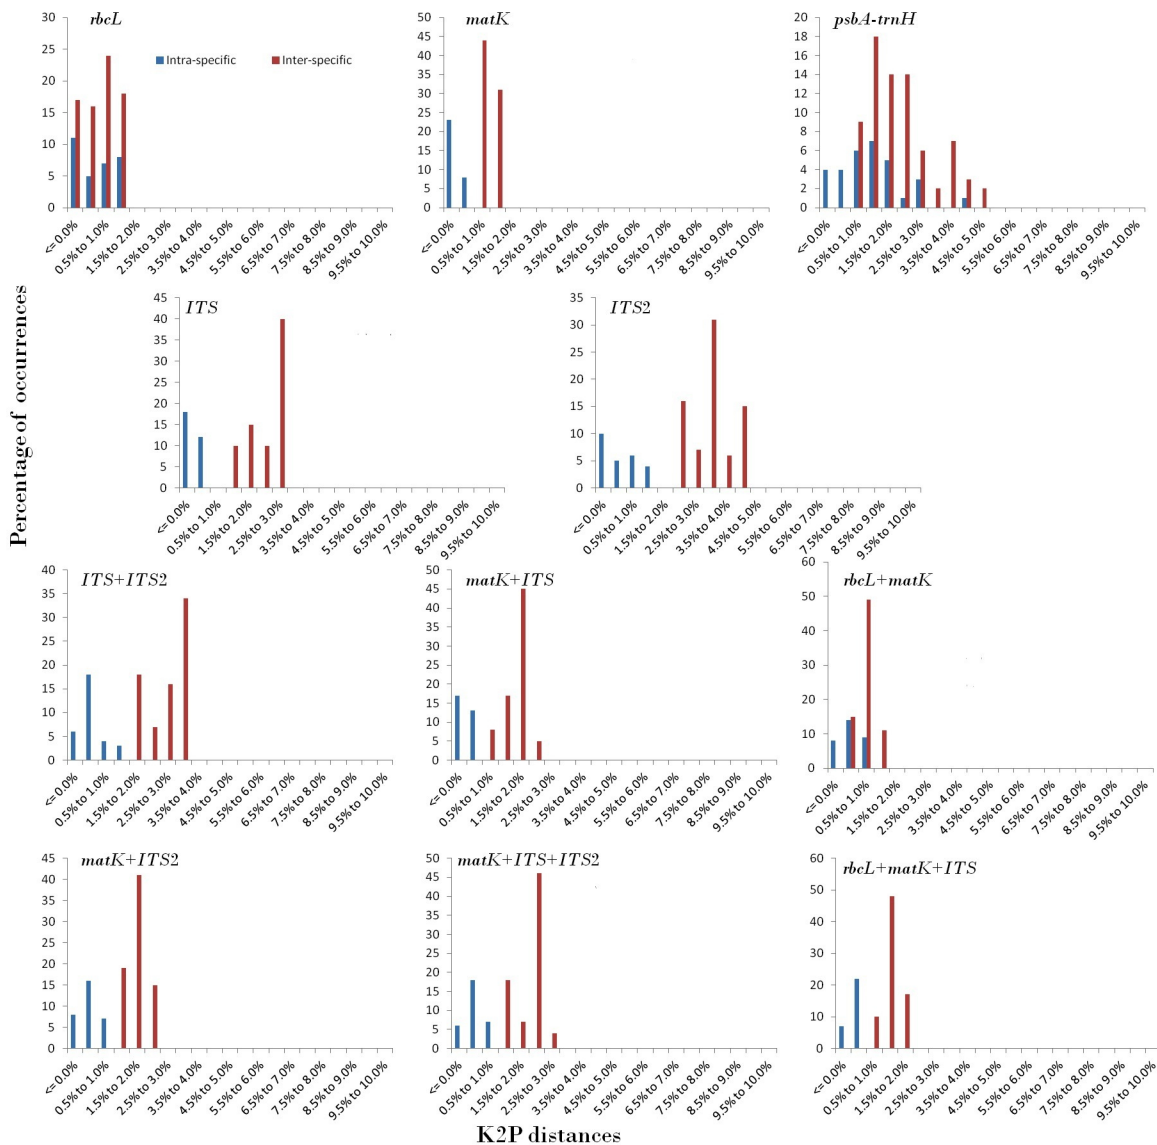

**K2P distances**

*rbcL*

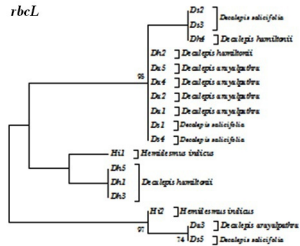

0.001

*matK*

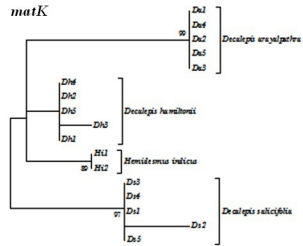

0.001

*psbA-trnH*

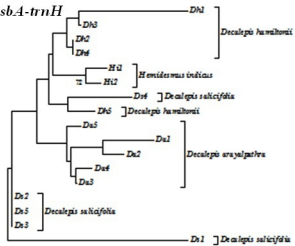

0.015

*ITS*

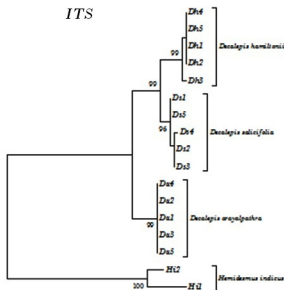

0.001

*ITS2*

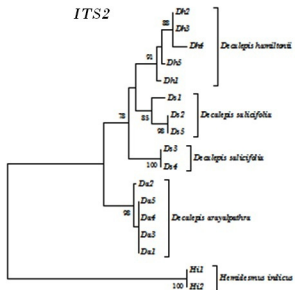

0.001

**Table S1. Primers used for amplification and sequencing for DNA barcoding of *Decalepis* species.**

| Region           | Primer name  | Sequence (5'-3')              | Thermal cycling conditions                                                  | Mean size | Reference |
|------------------|--------------|-------------------------------|-----------------------------------------------------------------------------|-----------|-----------|
| <i>rbcL</i>      | 1F           | 5'-ATGTCACCACAAACAGAAAC-3'    | 95°C 2 min; [35 cycles: 94°C 1 min; 55°C 30 s; 72°C 1 min]; 72°C 7 min      | 715 bp    | 25        |
|                  | 724R         | 5'-TCGCATGTACCTGCAGTAGC-3'    |                                                                             |           |           |
| <i>matK</i>      | 390F         | 5'-CGATCTATTCATTCAATATTTC-3'  | 95°C 2 min; [30 cycles: 94°C 1 min; 48°C 30 s; 72°C 1 min]; 72°C 7 min      | 856 bp    | 70        |
|                  | 1326R        | 5'-TCTAGCACACGAAAGTCGAAAGT-3' |                                                                             |           |           |
| <i>psbA-trnH</i> | <i>psbAF</i> | 5'-GTTATGCATGAACGTAATGCTC-3'  | 94°C 5 min; [35 cycles: 94°C 1 min; 55°C 30 s; 72°C 1.5 min]; 72°C 7 min    | 400 bp    | 71        |
|                  | <i>trnHR</i> | 5'-CGCGCATGGTGGATTACAATCC-3'  |                                                                             |           |           |
| <i>ITS</i>       | <i>ITS5a</i> | 5'-CCTTATCATTAGAGGAAGGAG-3'   | 94°C 5 min; [30 cycles: 94°C 1 min; 50°C 1 min; 72°C 1.5 min]; 72°C 7 min   | 704 bp    | 25        |
|                  | <i>ITS4</i>  | 5'- ATGCGATACTGGTGTGAAT -3'   |                                                                             |           |           |
| <i>ITS2</i>      | <i>S2F</i>   | 5'-TCCTCCGCTTATTGATATGC-3'    | 94°C 5 min; [40 cycles: 94°C 30 sec; 56°C 30 sec; 72°C 45 sec]; 72°C 10 min | 450 bp    | 53        |
|                  | <i>S3R</i>   | 5'- GACGCTTCTCCAGACTACAAT-3'  |                                                                             |           |           |

**Table S2. Mean and maximum intra-specific and nearest neighbor (NN) distance for all the species using candidate barcodes.**

| Barcode          | Species                       | Mean intra-specific distance | Max intra-specific distance | Nearest Neighbour      | Distance to NN |
|------------------|-------------------------------|------------------------------|-----------------------------|------------------------|----------------|
| <i>rbcL</i>      | <i>Decalepis arayalpathra</i> | 0.48                         | 1.19                        | <i>D. salicifolia</i>  | 0              |
|                  | <i>Decalepis hamiltonii</i>   | 0.51                         | 0.89                        | <i>D. salicifolia</i>  | 0              |
|                  | <i>Decalepis salicifolia</i>  | 0.57                         | 1.34                        | <i>D. arayalpathra</i> | 0              |
|                  | <i>Hemidesmus indicus</i>     | 0.89                         | 0.89                        | <i>D. salicifolia</i>  | 0.15           |
| <i>matK</i>      | <i>Decalepis arayalpathra</i> | 0                            | 0                           | <i>D. hamiltonii</i>   | 0.8            |
|                  | <i>Decalepis hamiltonii</i>   | 0.05                         | 0.13                        | <i>H. indicus</i>      | 0.4            |
|                  | <i>Decalepis salicifolia</i>  | 0.11                         | 0.27                        | <i>D. hamiltonii</i>   | 0.67           |
|                  | <i>Hemidesmus indicus</i>     | 0                            | 0                           | <i>D. hamiltonii</i>   | 0.4            |
| <i>psbA-trnH</i> | <i>Decalepis arayalpathra</i> | 0.97                         | 1.62                        | <i>D. salicifolia</i>  | 0.8            |
|                  | <i>Decalepis hamiltonii</i>   | 1.02                         | 1.16                        | <i>D. salicifolia</i>  | 0.8            |
|                  | <i>Decalepis salicifolia</i>  | 1.63                         | 4.11                        | <i>D. hamiltonii</i>   | 0.8            |
|                  | <i>Hemidesmus indicus</i>     | 0.53                         | 0.53                        | <i>D. hamiltonii</i>   | 0.8            |
| <i>ITS</i>       | <i>Decalepis arayalpathra</i> | 0                            | 0                           | <i>D. salicifolia</i>  | 2.47           |
|                  | <i>Decalepis hamiltonii</i>   | 0.12                         | 0.3                         | <i>D. salicifolia</i>  | 1.37           |
|                  | <i>Decalepis salicifolia</i>  | 0.15                         | 0.3                         | <i>D. hamiltonii</i>   | 1.37           |
|                  | <i>Hemidesmus indicus</i>     | 2.15                         | 2.15                        | <i>D. arayalpathra</i> | 11.67          |
| <i>ITS2</i>      | <i>Decalepis arayalpathra</i> | 0.1                          | 0.25                        | <i>D. hamiltonii</i>   | 3.08           |
|                  | <i>Decalepis hamiltonii</i>   | 0.6                          | 1.27                        | <i>D. salicifolia</i>  | 2.03           |
|                  | <i>Decalepis salicifolia</i>  | 1.57                         | 2.29                        | <i>D. hamiltonii</i>   | 2.03           |
|                  | <i>Hemidesmus indicus</i>     | 0                            | 0                           | <i>D. arayalpathra</i> | 10.69          |

**Table S3. Genetic distance (%) measured using Kimura 2-parameter model for the candidate barcode loci and their combinations.**

| <b>Barcode locus/loci</b>             | <b>Range of Intra-specific distances (<math>\pm</math>S.D.)</b> | <b>Range of Inter-specific distances (<math>\pm</math>S.D.)</b> |
|---------------------------------------|-----------------------------------------------------------------|-----------------------------------------------------------------|
| <i>rbcL</i>                           | 0.004 ( $\pm$ 0.001) – 0.008 ( $\pm$ 0.003)                     | 0.004 ( $\pm$ 0.001) – 0.009 ( $\pm$ 0.003)                     |
| <i>matK</i>                           | 0.000 ( $\pm$ 0.000) – 0.001 ( $\pm$ 0.000)                     | 0.004 ( $\pm$ 0.002) – 0.013 ( $\pm$ 0.004)                     |
| <i>psbA-trnH</i>                      | 0.005 ( $\pm$ 0.003) – 0.016 ( $\pm$ 0.004)                     | 0.015 ( $\pm$ 0.005) – 0.021 ( $\pm$ 0.006)                     |
| <i>ITS</i>                            | 0.000 ( $\pm$ 0.000) – 0.215 ( $\pm$ 0.005)                     | 0.015 ( $\pm$ 0.004) – 0.132 ( $\pm$ 0.015)                     |
| <i>ITS2</i>                           | 0.000 ( $\pm$ 0.000) – 0.015 ( $\pm$ 0.004)                     | 0.025 ( $\pm$ 0.006) – 0.122 ( $\pm$ 0.019)                     |
| <i>rbcL+ matK</i>                     | 0.002 ( $\pm$ 0.000) – 0.004 ( $\pm$ 0.001)                     | 0.006 ( $\pm$ 0.002) – 0.009 ( $\pm$ 0.002)                     |
| <i>rbcL+ psbA-trnH</i>                | 0.006 ( $\pm$ 0.001) – 0.009 ( $\pm$ 0.001)                     | 0.010 ( $\pm$ 0.002) – 0.013 ( $\pm$ 0.003)                     |
| <i>rbcL+ITS</i>                       | 0.002 ( $\pm$ 0.000) – 0.015 ( $\pm$ 0.003)                     | 0.011 ( $\pm$ 0.002) – 0.066 ( $\pm$ 0.007)                     |
| <i>rbcL+ITS2</i>                      | 0.003 ( $\pm$ 0.001) – 0.009 ( $\pm$ 0.002)                     | 0.013 ( $\pm$ 0.003) – 0.047 ( $\pm$ 0.006)                     |
| <i>matK+ psbA-trnH</i>                | 0.001 ( $\pm$ 0.001) – 0.006 ( $\pm$ 0.001)                     | 0.008 ( $\pm$ 0.002) – 0.015 ( $\pm$ 0.003)                     |
| <i>matK+ITS</i>                       | 0.000 ( $\pm$ 0.000) – 0.009 ( $\pm$ 0.002)                     | 0.011 ( $\pm$ 0.003) – 0.061 ( $\pm$ 0.006)                     |
| <i>matK+ITS2</i>                      | 0.000 ( $\pm$ 0.000) – 0.006 ( $\pm$ 0.001)                     | 0.013 ( $\pm$ 0.003) – 0.043 ( $\pm$ 0.006)                     |
| <i>psbA-trnH+ITS</i>                  | 0.003 ( $\pm$ 0.001) – 0.015 ( $\pm$ 0.004)                     | 0.017 ( $\pm$ 0.003) – 0.087 ( $\pm$ 0.009)                     |
| <i>psbA-trnH+ITS2</i>                 | 0.002 ( $\pm$ 0.001) – 0.015 ( $\pm$ 0.003)                     | 0.023 ( $\pm$ 0.004) – 0.067 ( $\pm$ 0.009)                     |
| <i>ITS+ITS2</i>                       | 0.000 ( $\pm$ 0.000) – 0.013 ( $\pm$ 0.003)                     | 0.019 ( $\pm$ 0.004) – 0.128 ( $\pm$ 0.011)                     |
| <i>rbcL+ matK+ psbA-trnH</i>          | 0.003 ( $\pm$ 0.000) – 0.005 (0.001)                            | 0.008 ( $\pm$ 0.002) – 0.011 ( $\pm$ 0.002)                     |
| <i>rbcL+ matK+ITS</i>                 | 0.001 ( $\pm$ 0.000) – 0.009 ( $\pm$ 0.002)                     | 0.010 ( $\pm$ 0.002) – 0.044 ( $\pm$ 0.004)                     |
| <i>rbcL+ matK+ITS2</i>                | 0.001 ( $\pm$ 0.000) – 0.005 ( $\pm$ 0.001)                     | 0.011 ( $\pm$ 0.002) – 0.030 ( $\pm$ 0.004)                     |
| <i>rbcL+ psbA-trnH+ITS</i>            | 0.003 ( $\pm$ 0.000) – 0.012 ( $\pm$ 0.002)                     | 0.013 ( $\pm$ 0.002) – 0.054 ( $\pm$ 0.005)                     |
| <i>rbcL+ psbA-trnH+ITS2</i>           | 0.004 ( $\pm$ 0.001) – 0.011 ( $\pm$ 0.001)                     | 0.015 ( $\pm$ 0.003) – 0.039 ( $\pm$ 0.005)                     |
| <i>rbcL+ITS+ITS2</i>                  | 0.002 ( $\pm$ 0.000) – 0.011 ( $\pm$ 0.002)                     | 0.014 ( $\pm$ 0.002) – 0.078 ( $\pm$ 0.006)                     |
| <i>matK+ psbA-trnH+ITS</i>            | 0.002 ( $\pm$ 0.000) – 0.009 ( $\pm$ 0.002)                     | 0.013 ( $\pm$ 0.002) – 0.052 ( $\pm$ 0.005)                     |
| <i>matK+ psbA-trnH+ITS2</i>           | 0.001 ( $\pm$ 0.000) – 0.008 ( $\pm$ 0.001)                     | 0.015 ( $\pm$ 0.002) – 0.038 ( $\pm$ 0.005)                     |
| <i>matK+ITS+ITS2</i>                  | 0.000 ( $\pm$ 0.000) – 0.007 ( $\pm$ 0.001)                     | 0.014 ( $\pm$ 0.003) – 0.074 ( $\pm$ 0.007)                     |
| <i>psbA-trnH+ITS+ITS2</i>             | 0.002 ( $\pm$ 0.000) – 0.011 ( $\pm$ 0.003)                     | 0.019 ( $\pm$ 0.003) – 0.096 ( $\pm$ 0.008)                     |
| <i>rbcL+ matK+ psbA-trnH+ITS</i>      | 0.002 ( $\pm$ 0.000) – 0.008 ( $\pm$ 0.002)                     | 0.011 ( $\pm$ 0.002) – 0.040 ( $\pm$ 0.004)                     |
| <i>rbcL+ matK+ psbA-trnH+ITS2</i>     | 0.003 ( $\pm$ 0.000) – 0.007 ( $\pm$ 0.001)                     | 0.013 ( $\pm$ 0.002) – 0.029 ( $\pm$ 0.003)                     |
| <i>rbcL+ psbA-trnH+ITS+ITS2</i>       | 0.003 ( $\pm$ 0.000) – 0.010 ( $\pm$ 0.002)                     | 0.015 ( $\pm$ 0.002) – 0.066 ( $\pm$ 0.006)                     |
| <i>rbcL+ matK+ITS+ITS2</i>            | 0.001 ( $\pm$ 0.000) – 0.008 ( $\pm$ 0.001)                     | 0.012 ( $\pm$ 0.002) – 0.055 ( $\pm$ 0.004)                     |
| <i>matK+ psbA-trnH+ITS+ITS2</i>       | 0.001 ( $\pm$ 0.000) – 0.007 ( $\pm$ 0.001)                     | 0.015 ( $\pm$ 0.002) – 0.063 ( $\pm$ 0.005)                     |
| <i>rbcL+ matK+ psbA-trnH+ITS+ITS2</i> | 0.002 ( $\pm$ 0.000) – 0.007 ( $\pm$ 0.001)                     | 0.013 ( $\pm$ 0.002) – 0.050 ( $\pm$ 0.004)                     |



**Table S4. Identification success rates based on analysis of the ‘Best match’, ‘Best close match’ and ‘All species barcodes’ function of TaxonDNA software for each DNA barcoding marker and its combinations.**

| Barcode locus/loci               | Threshold (%) | Best match (%)              |               |                   | Best close match (%)        |               |                   |              | All species barcode (%) |
|----------------------------------|---------------|-----------------------------|---------------|-------------------|-----------------------------|---------------|-------------------|--------------|-------------------------|
|                                  |               | Successfully identified (%) | Ambiguous (%) | Misidentified (%) | Successfully identified (%) | Ambiguous (%) | Misidentified (%) | No match (%) |                         |
| <i>rbcL</i>                      | 1.34          | 3 (17.64)                   | 10 (58.52)    | 4 (23.52)         | 3 (17.64)                   | 10 (58.52)    | 4 (23.52)         | 0 (0.00)     | 0.00                    |
| <i>matK</i>                      | 0.25          | 17 (100)                    | 0 (0.00)      | 0 (0.00)          | 15 (88.23)                  | 0 (0.00)      | 0 (0.00)          | 2 (11.76)    | 76.47                   |
| <i>psbA-trnH</i>                 | 4.09          | 16 (94.11)                  | 0 (0.00)      | 1(5.88)           | 16 (94.11)                  | 0 (0.00)      | 1 (5.88)          | 0 (0.00)     | 17.64                   |
| <i>ITS</i>                       | 2.15          | 17 (100)                    | 0 (0.00)      | 0 (0.00)          | 15 (88.23)                  | 0 (0.00)      | 0 (0.00)          | 2 (11.76)    | 88.23                   |
| <i>ITS2</i>                      | 2.27          | 17 (100)                    | 0 (0.00)      | 0 (0.00)          | 17 (100)                    | 0 (0.00)      | 0 (0.00)          | 0 (0.00)     | 58.82                   |
| <i>rbcL+ matK</i>                | 0.76          | 14 (82.35)                  | 1 (5.88)      | 2 (11.76)         | 14 (82.35)                  | 1 (5.88)      | 2 (11.76)         | 0 (0.00)     | 5.88                    |
| <i>rbcL+ psbA-trnH</i>           | 1.73          | 13 (76.47)                  | 0 (0.00)      | 4 (23.52)         | 13 (76.47)                  | 0 (0.00)      | 4 (23.52)         | 0 (0.00)     | 11.76                   |
| <i>rbcL+ITS</i>                  | 1.50          | 17 (100)                    | 0 (0.00)      | 0 (0.00)          | 15 (88.23)                  | 0 (0.00)      | 0 (0.00)          | 2 (11.76)    | 88.23                   |
| <i>rbcL+ITS2</i>                 | 1.69          | 17 (100)                    | 0 (0.00)      | 0 (0.00)          | 17 (100)                    | 0 (0.00)      | 0 (0.00)          | 0 (0.00)     | 64.7                    |
| <i>matK+ psbA-trnH</i>           | 1.34          | 17 (100)                    | 0 (0.00)      | 0 (0.00)          | 13 (76.47)                  | 0 (0.00)      | 4 (23.52)         | 0 (0.00)     | 64.7                    |
| <i>matK+ITS</i>                  | 0.99          | 17 (100)                    | 0 (0.00)      | 0 (0.00)          | 15 (88.23)                  | 0 (0.00)      | 0 (0.00)          | 2 (11.76)    | 88.23                   |
| <i>matK+ITS2</i>                 | 0.95          | 17 (100)                    | 0 (0.00)      | 0 (0.00)          | 17 (100)                    | 0 (0.00)      | 0 (0.00)          | 0 (0.00)     | 88.23                   |
| <i>psbA-trnH+ITS</i>             | 1.64          | 14 (82.35)                  | 1 (5.88)      | 2 (11.76)         | 14 (82.35)                  | 1 (5.88)      | 2 (11.76)         | 0 (0.00)     | 82.35                   |
| <i>psbA-trnH+ITS2</i>            | 3.16          | 13 (76.47)                  | 0 (0.00)      | 4 (23.52)         | 13 (76.47)                  | 0 (0.00)      | 4 (23.52)         | 0 (0.00)     | 58.82                   |
| <i>ITS+ITS2</i>                  | 1.33          | 17 (100)                    | 0 (0.00)      | 0(0.00)           | 15 (88.23)                  | 0(0.00)       | 0 (0.00)          | 2 (11.76)    | 88.23                   |
| <i>rbcL+ matK+ psbA-trnH</i>     | 1.00          | 17 (100)                    | 0 (0.00)      | 0 (0.00)          | 15 (88.23)                  | 0 (0.00)      | 0 (0.00)          | 2 (11.76)    | 47.05                   |
| <i>rbcL+ matK+ITS</i>            | 0.95          | 17 (100)                    | 0 (0.00)      | 0 (0.00)          | 17 (100)                    | 0 (0.00)      | 0 (0.00)          | 0 (0.00)     | 88.23                   |
| <i>rbcL+ matK+ITS2</i>           | 0.99          | 17 (100)                    | 0 (0.00)      | 0 (0.00)          | 17 (100)                    | 0 (0.00)      | 0 (0.00)          | 0 (0.00)     | 76.47                   |
| <i>rbcL+ psbA-trnH+ITS</i>       | 1.28          | 17 (100)                    | 0 (0.00)      | 0 (0.00)          | 15 (88.23)                  | 0 (0.00)      | 0 (0.00)          | 2 (11.76)    | 88.23                   |
| <i>rbcL+ psbA-trnH+ITS2</i>      | 1.66          | 17 (100)                    | 0 (0.00)      | 0 (0.00)          | 17 (100)                    | 0 (0.00)      | 0 (0.00)          | 0 (0.00)     | 47.05                   |
| <i>rbcL+ITS+ITS2</i>             | 1.15          | 17 (100)                    | 0 (0.00)      | 0 (0.00)          | 15 (88.23)                  | 0 (0.00)      | 0 (0.00)          | 2 (11.76)    | 88.23                   |
| <i>matK+ psbA-trnH+ITS</i>       | 0.94          | 17 (100)                    | 0 (0.00)      | 0 (0.00)          | 17 (100)                    | 0 (0.00)      | 0 (0.00)          | 0 (0.00)     | 88.23                   |
| <i>matK+ psbA-trnH+ITS2</i>      | 1.58          | 17 (100)                    | 0 (0.00)      | 0 (0.00)          | 17 (100)                    | 0 (0.00)      | 0 (0.00)          | 0 (0.00)     | 82.35                   |
| <i>matK+ITS+ITS2</i>             | 0.76          | 17 (100)                    | 0 (0.00)      | 0 (0.00)          | 15 (88.23)                  | 0 (0.00)      | 0 (0.00)          | 2 (11.76)    | 88.23                   |
| <i>psbA-trnH+ITS+ITS2</i>        | 1.83          | 17 (100)                    | 0 (0.00)      | 0 (0.00)          | 17 (100)                    | 0(0.00)       | 0(0.00)           | 0(0.00)      | 82.35                   |
| <i>rbcL+ matK+ psbA-trnH+ITS</i> | 0.88          | 17 (100)                    | 0 (0.00)      | 0 (0.00)          | 15 (88.23)                  | 0(0.00)       | 0(0.00)           | 2(11.76)     | 88.23                   |

|                                       |      |          |          |          |            |          |          |           |       |
|---------------------------------------|------|----------|----------|----------|------------|----------|----------|-----------|-------|
| <i>rbcL+ matK+ psbA-trnH+ITS2</i>     | 1.09 | 17 (100) | 0 (0.00) | 0 (0.00) | 17 (100)   | 0 (0.00) | 0 (0.00) | 0 (0.00)  | 88.23 |
| <i>rbcL+ psbA-trnH+ITS+ITS2</i>       | 1.24 | 17 (100) | 0 (0.00) | 0 (0.00) | 17 (100)   | 0 (0.00) | 0 (0.00) | 0 (0.00)  | 88.23 |
| <i>rbcL+ matK+ITS+ITS2</i>            | 0.80 | 17 (100) | 0 (0.00) | 0 (0.00) | 15 (88.23) | 0 (0.00) | 0 (0.00) | 2 (11.76) | 88.23 |
| <i>matK+ psbA-trnH+ITS+ITS2</i>       | 1.19 | 17 (100) | 0 (0.00) | 0 (0.00) | 17 (100)   | 0 (0.00) | 0 (0.00) | 0 (0.00)  | 88.23 |
| <i>rbcL+ matK+ psbA-trnH+ITS+ITS2</i> | 0.91 | 17 (100) | 0 (0.00) | 0 (0.00) | 17 (100)   | 0 (0.00) | 0 (0.00) | 0 (0.00)  | 88.23 |

Identification analysis for each barcoding marker and its combinations was performed at their respective threshold calculated from pairwise distances.
